***Quantifying the subjective cost of self-control in humans***

Candace M. Raio<sup>1</sup> & Paul W. Glimcher<sup>1</sup>

*<sup>1</sup>Neuroscience Institute, New York University School of Medicine,  
New York, NY, 10016 USA*

\*Please address all correspondence to:

Dr. Candace M. Raio  
Neuroscience Institute  
New York University School of Medicine  
435 East 30<sup>th</sup> Street  
New York, NY 10016  
Email: [cmr385@nyu.edu](mailto:cmr385@nyu.edu)

**CLASSIFICATION:** SOCIAL SCIENCES (Psychological and Cognitive Sciences)

**KEYWORDS:** self-control, cognitive costs, decision-making, stress

**AUTHOR CONTRIBUTIONS:** C.M.R. and P.W.G. designed research; C.M.R. performed research and analyzed data; C.M.R. and P.W.G. wrote the paper.

## ABSTRACT

Since Odysseus committed to resisting the Sirens, mechanisms to limit self-control failure have been a central feature of human behavior. Psychologists have long argued that the use of self-control is an effortful process and, more recently, that its failure arises when the cognitive costs of self-control outweigh its perceived benefits. In a similar way, economists have argued that sophisticated choosers can adopt “pre-commitment strategies” that tie the hands of their future selves in order to reduce these costs. Yet, we still lack an empirical tool to quantify and demonstrate the cost of self-control. Here, we develop and validate a novel economic decision-making task to *quantify the subjective cost of self-control* by determining the monetary cost a person is willing to incur in order to eliminate the need for self-control. We find that humans will pay to avoid having to exert self-control in a way that scales with increasing levels of temptation and that these costs are modulated both by motivational incentives and stress exposure. Our psychophysical approach allows us to index moment-to-moment self-control costs at the within-subject level, validating important theoretical work across multiple disciplines and opening new avenues of self-control research in healthy and clinical populations.

**SIGNIFICANCE STATEMENT:**

The failure to use self-control is a fundamental problem that humans face in daily life. Recent work suggests that these ‘failures’ might be better understood as a rational decision-making process that weighs the benefits of exercising self-control against its attendant cognitive costs. However, we still know little about how to measure these costs or how they change under different circumstances. Across five independent studies, we find that self-control costs can be measured in humans through monetary willingness to pay to avoid temptation and further, that these costs are sensitive to motivational incentives, stress exposure and variability in temptation intensity. Our findings open new avenues of research into computational models of self-control that inform psychological, economic and health-policy research.

## 1 INTRODUCTION

2 When Odysseus tied himself to the mast of his ship so he could hear the song of  
3 the Sirens without approaching them, he deployed a *pre-commitment* mechanism  
4 that prevented a self-control failure. When his men were unable to leave the land  
5 of the lotus eaters, Homer urges us to see them as having failed in their self-  
6 control. But what does it mean for self-control to fail? This has been a central  
7 debate in human behavior for centuries. What has fueled this debate is not a  
8 failure to understand what self-control *feels* like; the subjective experience of  
9 resisting temptation is a universal one for humans. What has made self-control  
10 so elusive is determining how to convincingly and quantitatively measure it, and  
11 therefore to understand why it often fails. Whether we are trying to lose weight,  
12 quit smoking, avoid drugs, exercise more, drink less, or simply focus on a  
13 cognitively demanding task, the question remains: If one truly desires a particular  
14 long-term outcome, why is it so difficult to choose in favor of that outcome all of  
15 the time?

16 Emerging theoretical accounts from psychology and economics have attempted  
17 to untangle this question using economic models of ‘cost’. Exercising self-control,  
18 these accounts propose, is *cognitively costly*. From this perspective, ‘failures’ of  
19 self-control arise from a rational decision process that weighs the benefits of  
20 exercising control against its attendant costs. That is, when the cognitive costs  
21 exceed their perceived benefit, individuals should disengage in control  
22 processes. These ‘control costs’ are thought to stem from the limited cognitive  
23 resources available to support the demands of exercising control. As evidence of  
24 these costs, economic theories point to the fact that choosers often adopt *pre-*  
25 *commitment strategies*, presumably in an effort to reduce the need for self-  
26 control (e.g., Strotz, 1956; Thaler & Sherfin, 1981; Gul and Pesendorfer,  
27 2001/2004). Yet, the notion of self-control as ‘costly’ remains controversial in the  
28 absence of a robust psychophysical methodology for reliably demonstrating and  
29 measuring these costs.

## SELF-CONTROL COSTS

5

1 Historically, the accounts that have attempted to explain this puzzling disconnect  
2 between what we say we want and what we actually do, have pointed to the  
3 existence of self-control without providing a platform for its reliable demonstration  
4 and quantification. The first, emerging from the psychological literature, points to  
5 self-control as a top-down regulatory process that inhibits impulsive action in the  
6 service of long-term goals or social norms. Informed by findings from classic  
7 delay-of-gratification paradigms (e.g., the ‘marshmallow task’; Mischel &  
8 Ebbesen, 1970; Mischel, Ebbesen, & Zeiss, 1972; Mischel, Shoda, and  
9 Rodriguez, 1989; but see also McGuire & Kable, 2013) and theories of ego  
10 depletion (Baumeister, Bratslavsky, Muraven, & Tice, 1998; Muraven, Tice, &  
11 Baumeister, 1998; Baumeister & Heatherton, 1996; Muraven & Baumeister,  
12 2000; but also see Kurzban and colleagues, 2013), this account proposes that  
13 self-control relies on cognitive resources that are depleted the longer they are  
14 used. These theories suggest that the motivational or affective state of a chooser  
15 influences the availability or functional integrity of these resources. Fatigued or  
16 stressed choosers, for example, are often presumed to have more limited  
17 cognitive resources for self-control upon which to draw (Muraven, Tice, &  
18 Baumeister, 1998; Arnsten, 2009; Hockey, 1983; Holding, 1983). This body of  
19 work has dominated psychological conceptions of self-control as a form of  
20 ‘willpower’ with impulsive or suboptimal choice emerging from a failure or  
21 depletion of control resources. While this work aptly captures the subjectively  
22 difficult nature of exercising self-control, it has not provided a reliable method to  
23 quantify *how much control* is needed to successfully resist temptation.

24 A second account from the neoclassical economic literature examines a host of  
25 related choice problems including the failure to save money, over-consumption  
26 and procrastination (see Ariely & Wertenbroch, 2002; Bryan, Karlan & Nelson,  
27 2010 for behavioral examples). These economic models view self-control  
28 ‘failures’ as simple preference reversals (i.e., Strotz, 1956; Mischel & Ebbesen,  
29 1970; Ainslie, 1975; Schelling, 1984; Fishburn & Rubinstein, 1982; Bryan, Karlan

## SELF-CONTROL COSTS

6

1 & Nelson, 2010), and have generally eschewed the psychological notion of self-  
2 control as a hidden, and perhaps unnecessary, element. When individuals  
3 choose in ways that conflict with explicitly stated goals, these choosers are seen  
4 as revealing their *true preferences* through their observed choices. If this is the  
5 case however, why do individuals often choose in ways that conflict with  
6 previously stated goals, even choosing in ways that appear inconsistent or  
7 irrational (Strotz, 1955; Thaler & Sherfin, 1981; Tversky & Thaler, 1990)? Some  
8 behavioral economic work has accounted for this paradox with dual-self models  
9 that propose that choosers possess (at least) two sets of preferences that are in  
10 active competition (Thaler & Sherfin, 1981; Fudenberg & Levine; 2006), and  
11 temporal discounting models that include dynamic inconsistencies to drive  
12 changing preferences (Mazur, 1987; Ainslie, 1975; Laibson, 1997; Frederick et  
13 al., 2002; but see Kable & Glimcher, 2007/2010 for an alternate account).

14 While these models have provided important ways to quantify decision variables  
15 related to self-control, they do not fully explain *why* individuals are inconsistent in  
16 their actual choices. One widely influential resolution of this cross-disciplinary  
17 puzzle is to hypothesize that the experience of resisting immediate temptation is  
18 effortful and aversive, that is *disutile*. This inherent disutility implies that *self-*  
19 *control imposes a cost on choosers*, an idea formalized most recently and  
20 elegantly by Gul and Pesendorfer (2001, 2004) who proposed an axiomatic  
21 model of self-control. Gul and Pesendorfer proposed that the presence of  
22 temptation in an individual's 'menu' of choices will impose a cognitive cost,  
23 rendering decisions to reject tempting options more difficult. They hypothesized  
24 that if choosers know this, they should prefer choice menus that lack tempting  
25 options and might even seek to *minimize* control costs (and maximize utility) by  
26 preemptively eliminating tempting options from their choice menu, a  
27 phenomenon referred to as 'pre-commitment' (Strotz, 1956; Thaler & Sherfin,  
28 1981; see Bryan, Karlan & Nelson, 2010 for review). Examples of pre-  
29 commitment strategies that limit control costs might include a dieter who is willing

## SELF-CONTROL COSTS

7

1 to walk an extra block to avoid a local bakery or a gambler who drives an extra  
2 hour to avoid casinos. Gul and Pesendorfer thus argued that *preferences for pre-*  
3 *commitment reveal choosers' subjective cost of exercising control, pointing to a*  
4 *novel decision variable through which these costs can be measured.*

5 What has limited the impact of this set of hypotheses in an empirical sense is the  
6 absence of compelling and quantitative data to support it. Is there direct  
7 quantitative empirical evidence that self-control is costly, as so many have  
8 proposed? Are those costs stationary over time, or do they grow as the ego  
9 depletion literature suggests? Are these costs influenced by motivational or  
10 affective state as the psychological literature has proposed? Do these costs  
11 scale with varying levels of temptation? Despite a number of real-world  
12 observations of pre-commitment (see Bryan, Karlan & Nelson, 2010 for review),  
13 we still lack an empirical psychophysical tool for answering these questions.

14 Here we utilized a psychophysical approach to test the hypothesis that exercising  
15 self-control is cognitively costly and that these costs can be measured using a  
16 pre-commitment mechanism. While we acknowledge that there are undoubtedly  
17 many components that feed into an overall subjective cost of self-control, our  
18 goal here was to simply measure an aggregate of these costs. To do this, we  
19 developed an economic decision-making task that measures how much  
20 participants are willing to pay to adopt a pre-commitment device that removes  
21 temptation from their choice environment. We refer to the maximum dollar value  
22 participants will pay to remove temptation as their subjective 'cost of self-control'  
23 and show that these costs respond rationally to incentives, scale with increasing  
24 levels of temptation and predict rates of self-control failure. We further test the  
25 hypothesis that these costs are modulated by affective state, finding that stress  
26 exposure significantly increases the cost of self-control. Finally, we test the  
27 hypothesis that self-control costs grow with the ongoing exertion of self-control  
28 but find no empirical support for this hypothesis. These data identify a clear  
29 psychophysical approach for the measurement of self-control costs and may

1 open new avenues of research into computational models of self-control to  
2 inform psychological, economic, clinical and health policy research.

### 3 **RESULTS**

4 In our experiments, healthy, hungry dieters first provided health, taste and  
5 temptation ratings for a series of food items, allowing us to identify high- and low-  
6 tempting foods for each individual. Participants initially reported the most they  
7 would be willing-to-pay (from a \$10 monetary endowment) to avoid having the  
8 high-tempting food placed immediately in front of them for a 30-minute period  
9 (**Figure 1**). With a probability of 2% this reported 'bid' was entered into a  
10 standard economic auction procedure (see **Methods**; Becker, DeGroot &  
11 Marschak, 1964) that incentivizes participants to report their true subjective  
12 value—in this case the value of eliminating exposure to temptation. If they won  
13 this auction, the high-tempting food was replaced with a low-tempting food for 30  
14 minutes. If they lost the auction, the high tempting food remained in the room  
15 with them for 30 minutes. The price participants were willing to pay provided a  
16 within-subject estimate of the cost of self-control; that is, it reflected the maximal  
17 dollar value they were willing to pay to avoid exercising control.

18

19 The first bidding trial was made *without* the high tempting food in the room to  
20 capture each participants' prospective estimate of how costly self-control exertion  
21 would be (before exposure to temptation). If the initial trial was not realized (as  
22 occurred on 98% of trials), the high-tempting food was brought into the room.  
23 Participants were then prompted to report, periodically during 30-minutes of  
24 exposure, how much they were willing-to-pay to replace the high-tempting food  
25 with the low-tempting food for the next 30 minutes. As with the initial bid, these  
26 subsequent bidding trials had a 2% chance of going to auction, which would  
27 bring the experiment to a premature close. Bidding trials were collected every  
28 few minutes (**Methods**) for the 30-minute exposure period. If the 30-minute  
29 exposure period elapsed without any bid being realized, the subjects remained in



## SELF-CONTROL COSTS

9

- 1 the room with the high-tempting good for a final 30 minutes. This allowed us to
- 2 track how these self-control costs change over time as participants are
- 3 continuously exposed to temptation and whether self-control ever failed.

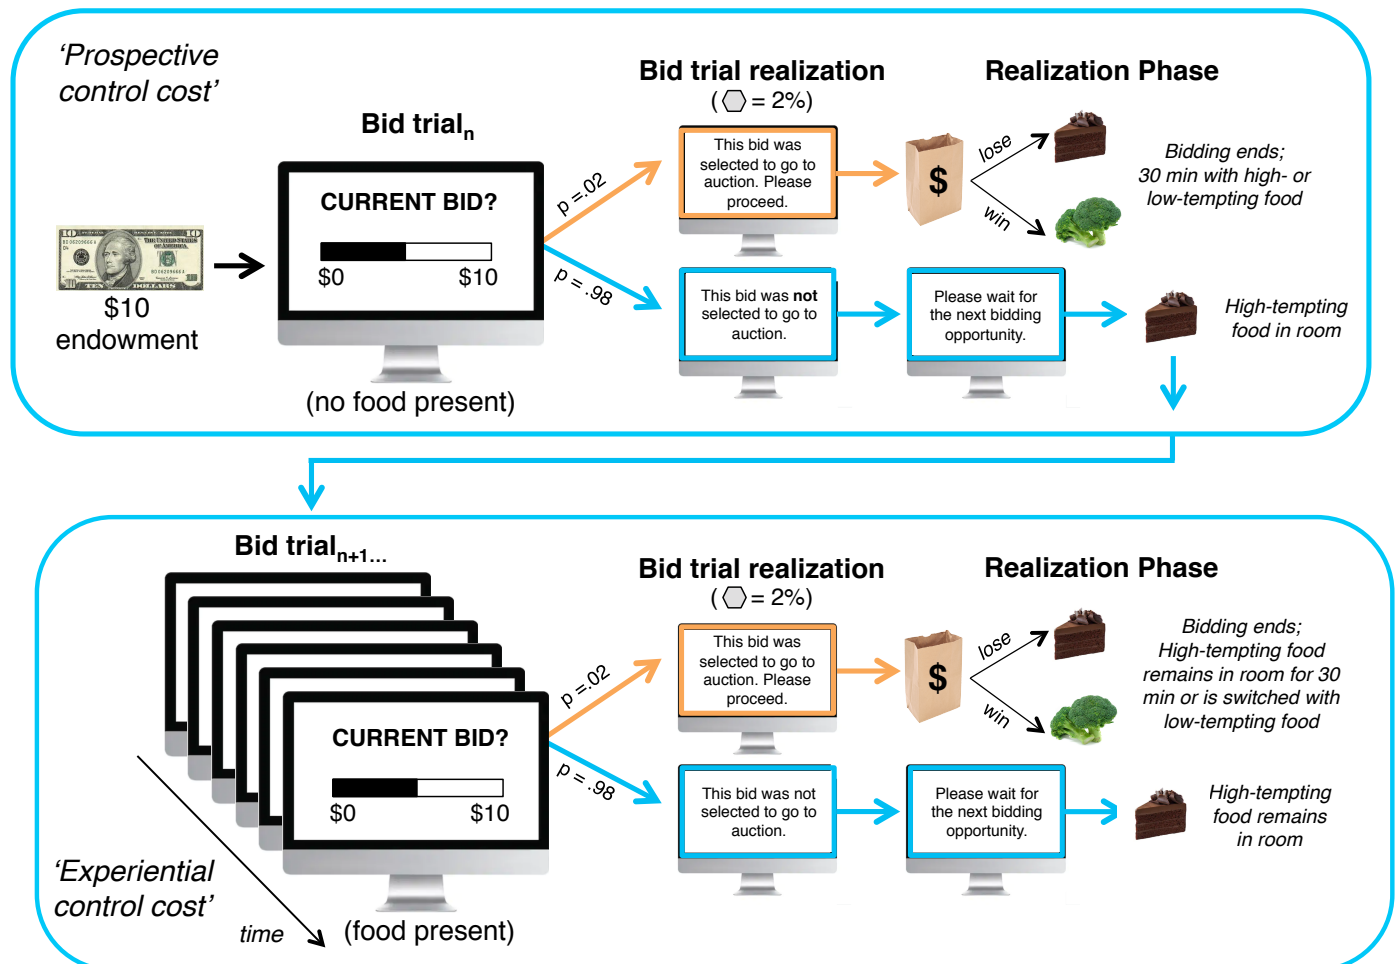

**Figure 1.** Illustration of the self-control decision task. Participants reported their willingness-to-pay to avoid a tempting food reward both before the food was present (top panel) and, periodically over a 30-minute period, with added direct exposure to the food (bottom panel).

- 4 The only observable behavior of interest during the final 30-minute interval of the
- 5 experiment was whether or not the participant consumed the food. This
- 6 *realization phase* of the experiment ensured that it was incentive-compatible,
- 7 meaning participants' choices allowed them to avoid real temptations and the
- 8 negative outcomes associated with those temptations. The 2% chance of each

## SELF-CONTROL COSTS

10

1 bid being realized ensured participants knew that what they bid on the current  
2 trial was important, since it could determine whether they were required to spend  
3 the next 30 minutes alone in the experiment room with a tempting food reward,  
4 the consumption of which did not align with their stated goals.

5 **Study 1: Self-control imposes costs as revealed by willingness-to-pay for**  
6 **pre-commitment.** Our primary question of interest was whether the presence of  
7 a tempting good participants want to avoid consuming does in fact impose a cost  
8 on choosers. If so, participants should be willing to pay to remove temptation and  
9 eliminate the associated control cost. In accord with predictions from these  
10 economic models, we found that participants ( $n=32$ ) were willing to pay a  
11 maximum of, on average, 15% of their \$10 endowment (or  $\$1.57 \pm 1.78$  SD) to  
12 adopt a pre-commitment device that avoided temptation. This provides a direct  
13 scalar measurement of their subjective cost of resisting temptation (**Figure 2A**).  
14 Participants were not only willing to pay to prospectively avoid temptation (mean  
15 of first bid trial, pre-exposure =  $\$1.47 \pm 1.59$  SD), but they continued to pay  
16 throughout the task, providing a continuous measurement of the underlying costs  
17 of resisting temptation with continuing exposure to the food (mean of subsequent  
18 bid trials, post-exposure =  $\$1.58 \pm 1.82$  SD).

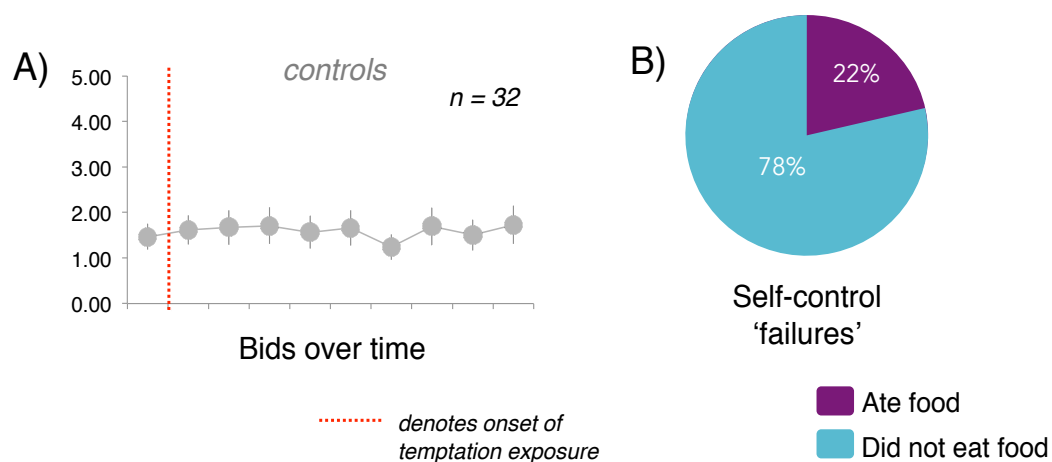

**Figure 2. Study 1. (A)** Bids over time for control group; **(B)** Proportion of subjects in Study 1 that consumed tempting food during the study. Error bars denote SEM.

## SELF-CONTROL COSTS

11

1 Our initial experiment thus demonstrates that self-control imposes a subjective  
2 cost on choosers that can be measured monetarily. However, the process of  
3 deploying self-control in the presence of temptation has been proposed to  
4 change over time. Continued exposure to a tempting good is often thought to  
5 increase the difficulty of exerting self-control. Given the long-standing debate  
6 emerging from ego depletion literature (Kurzban et al., 2013) on whether self-  
7 control resources deplete over time, we examined the dynamics of how bids  
8 changed both before and after exposure to temptation (**Figure 2A**). We found  
9 that average pre- versus post-exposure bids did not significantly differ (paired  
10 samples t-test:  $t_{(31)} = -0.533$ ,  $P = 0.598$ ,  $d = 0.099$ , two-tailed), suggesting that  
11 our dieters were accurate in their prospective cost estimates. Perhaps more  
12 interestingly, a repeated-measures ANOVA assessing post-exposure bids as a  
13 function of time indicated that on average there were no significant linear trends  
14 in these costs despite ongoing exposure to temptation ( $F_{(4,122)} = 0.722$ ,  $P = 0.576$ ;  
15 Greenhouse-Geisser correction factor,  $\epsilon = 0.30$ ;  $\eta_p^2 = 0.023$ ). Thus, we found no  
16 evidence that, on average, ongoing exposure to temptation increased control  
17 costs (or ‘depleted’ control resources) over the interval used in our task. We note,  
18 however, that individual variability exists in our data set, such that some  
19 participants’ bids increased systematically while for others they decreased.  
20 Finally, we note that 22% of our subjects consumed the tempting food during the  
21 ensuing 30-minute exposure period (**Figure 2B**).

22 ***Study 2: Motivational incentives modulate willingness-to-pay for pre-***  
23 ***commitment.*** Next, we sought to both replicate this finding, and further test how  
24 motivational incentives to sustain goal-directed behavior might affect these costs.  
25 In this second experiment we increased the cost of self-control failure and  
26 examined whether participants were then willing to pay more for pre-commitment  
27 to reduce self-control failures. To do this, we repeated our study in a second  
28 cohort of dieters but instructed participants that they would lose a \$15 bonus at  
29 the end of the study if they consumed the tempting food at any point. We

## SELF-CONTROL COSTS

12

1 hypothesized that by increasing the cost of self-control failure, the value of a pre-  
2 commitment strategy that restricts temptation should be also be higher.

3

4 Thirty-four new dieters completed our self-control measurement task with the  
5 addition of this second monetary incentive. Dieters again showed a reliable and  
6 consistent willingness-to-pay to avoid temptation (mean bid =  $\$2.85 \pm 2.70$  SD).

7 Consistent with our hypothesis, the addition of the \$15 cost for eating the  
8 tempting food led to a higher willingness-to-pay for pre-commitment (**Figure 3A**).

9 Combining the data across experiments 1 and 2, a repeated-measures ANOVA  
10 with a within-subject factor of time (bids 1-10) and a between-subject factor of  
11 group (no external incentive, incentive) revealed a main effect of group ( $F_{(1,64)} =$   
12  $4.95$ ,  $P = 0.03$ ,  $\eta_p^2 = 0.07$ ), but no effect of time ( $P = 0.73$ ) or time x group  
13 interaction ( $P = 0.45$ ). This difference at the group level suggests that participants  
14 were willing to spend more money to sustain goal-directed behavior when the  
15 costs of not adhering to this goal were higher. We note also that under these  
16 conditions none of the subjects who faced the tempting good consumed it  
17 (**Figure 3B**).

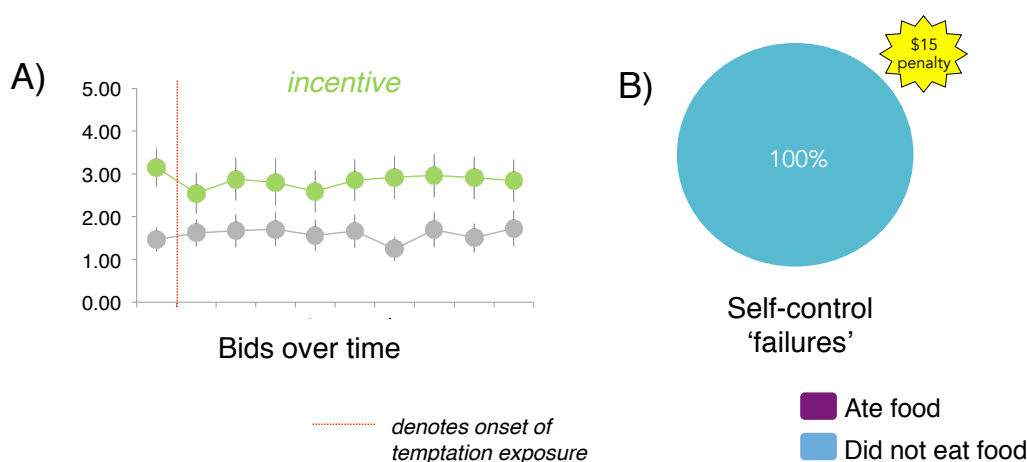

**Figure 3. Study 2. (A)** Bids to avoid exposure to the tempting food over time in participants for which a \$15 monetary loss was imposed for consuming the food (depicted in green; Incentive group) and for those where no monetary loss was imposed (depicted in gray; Control group); **(B)** Proportion of subjects in Study 2 that consumed tempting food during study.

1 **Study 3: Acute stress increases the cost of self-control.** Given the tightly  
2 coupled relationship between self-control failure and the experience of negative  
3 emotional states such as stress, we next examined how exposure to an acute  
4 stressor would influence participants' self-control costs. Specifically, we tested  
5 the widely held hypothesis that stress makes self-control more 'costly'. To elicit  
6 subjective and neurophysiological stress responses, we recruited a new cohort of  
7 dieters ( $n=31$ ) that underwent the Cold-Pressor Task (CPT; Lovallo, 1975;  
8 Velasco, Gómez, Blanco & Rodriguez, 1997; McRae et al. 2006) prior to the self-  
9 control choice task. The CPT is widely used in laboratory settings to reliably  
10 induce mild-to-moderate levels of physiological stress and simply requires  
11 participants to submerge their forearms in ice-water continuously for 3-minutes  
12 (**Methods**). Confirming the efficacy of our stress induction procedures,  
13 participants in the CPT condition showed elevated concentrations of salivary  
14 cortisol, the primary neuroendocrine marker of Hypothalamic-Pituitary-Adrenal  
15 (HPA-) axis activity (**Figure S1; SI Results**).

16 We assessed whether our stress manipulation influenced the cost of self-control  
17 both prior to temptation exposure—when participants were prospectively  
18 estimating these costs—and after the highly-tempting food was introduced.  
19 **Figure 4A** depicts aggregate trial-by-trial bidding behavior for participants in the  
20 stress condition. A repeated-measures ANOVA across all studies revealed a  
21 main effect of group ( $F_{(1,61)} = 8.30$ ,  $P = 0.005$ ;  $\eta_p^2 = 0.120$ ), no effect of time ( $P =$   
22  $0.34$ ) or time X group interaction ( $P = 0.44$ ). Follow-up t-tests confirmed that  
23 stressed participants reported a higher willingness-to-pay overall (mean bid =  
24  $\$3.38 \pm 3.04$  SD) relative to non-stressed controls (independent samples t-test:  
25  $t_{(61)} = -2.88$ ,  $P=0.005$ ,  $d= 0.72$ , two-tailed), suggesting that our experimentally-  
26 induced state of stress was reflected in the valuation of pre-commitment to  
27 restrict temptation. These increases in the stress group were observed during  
28 prospective bids (pre-exposure, Bid<sub>1</sub>:  $t_{(61)} = -3.71$ ,  $P=0.0004$ ,  $d= 0.93$ , two-tailed)  
29 and persisted across subsequent post-exposure trials (mean of post-exposure

## SELF-CONTROL COSTS

14

1 bids: ( $t_{(61)} = -2.77$ ,  $P=0.007$ ,  $d= 0.67$ , two-tailed). Thus, exposure to acute stress  
2 appears to have more than doubled (at a between-subjects level) the average  
3 subjective cost of self-control. We note that, similar to Study 1, 23% of our  
4 subjects consumed the tempting good (**Figure 4B**). A final cohort (Study 4) using  
5 the same incentive structure as Study 2 (\$15 penalty) was also assessed under  
6 stress (see **Figure S2, SI Results**).

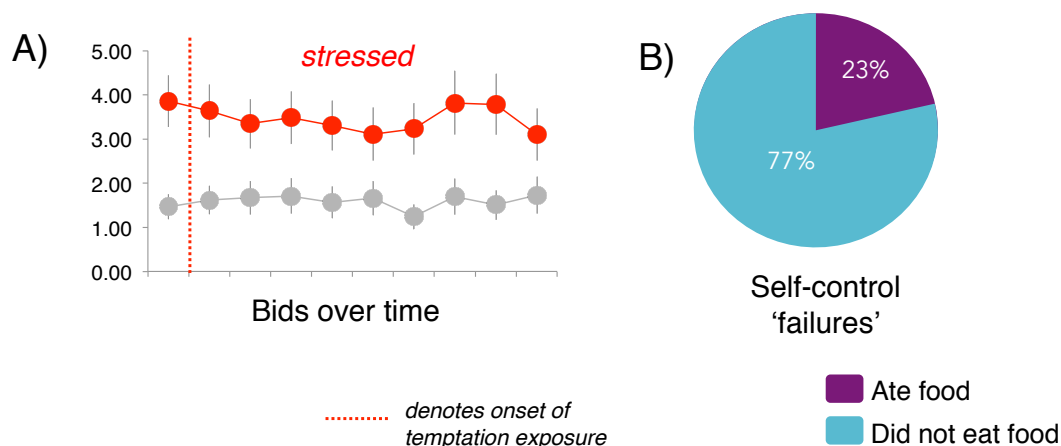

**Figure 4. Study 3. (A)** Bids to avoid exposure to the tempting food over time for participants that underwent a physiological stress manipulation (depicted in red; Stress group) and for non-stressed participants (depicted in gray; Control group); **(B)** Proportion of subjects that consumed tempting food during study.

17 **Secondary Analysis 1: Self-control 'failures' were associated with a higher**  
18 **willingness-to-pay to avoid control.** If we assume that subjects do face costs  
19 for exercising self-control, then we should expect to see subjects experience self-  
20 control failures on occasion. Further, we might expect to find that subjects willing  
21 to pay more for pre-commitment experience higher self-control costs and thus  
22 might be expected to fail in their self-control more often than subjects who report  
23 lower monetary costs for self-control. To test these hypotheses, we examined  
24 each subject's behavior after the bidding phase of the experiment was  
25 complete—during the final 30-minute phase of the experiment (**Methods**). During  
26 this phase, if no bids had been realized (which was usually the case given the  
27 low probability any bid trial was realized), participants were required to remain in

## SELF-CONTROL COSTS

15

1 the room for the final 30 minutes of the experiment with the tempting food. No  
2 further bids were collected during this phase. During this period, we simply  
3 observed whether or not each participant consumed the tempting food (a self-  
4 control “failure”). The proportion of participants that consumed the tempting food  
5 are presented alongside bidding behavior in **Figures 2B-4B**). In Study 1 (no  
6 stress, no monetary penalty for eating food), approximately 22% of participants  
7 consumed the tempting food during the realization phase of the study (**Figure**  
8 **2B**). In Study 2, where we imposed an additional (monetary) cost for eating the  
9 tempting food, we observed that no participants consumed the food (**Figure 3B**).  
10 In Study 3, where we induced acute stress responses but imposed no monetary  
11 cost for eating the food, again 23% of participants consumed the food (**Figure**  
12 **4B**). Given that consumption rates did not differ between groups that did not  
13 receive the monetary incentive to avoid control (Study 1 and 3), we combined  
14 these groups to examine how bidding behavior differed in dieters that ate the  
15 food vs. those that did not. Consistent with the notion that participants’  
16 willingness-to-pay to avoid control reflects their subjective cost of control, those  
17 participants who ate the food offered to pay significantly more to avoid temptation  
18 relative to participants who did not eat the food (independent samples t-test:  $t_{(61)}$   
19 = 2.80,  $P=0.006$ ; two-tailed; **Figure 5**).

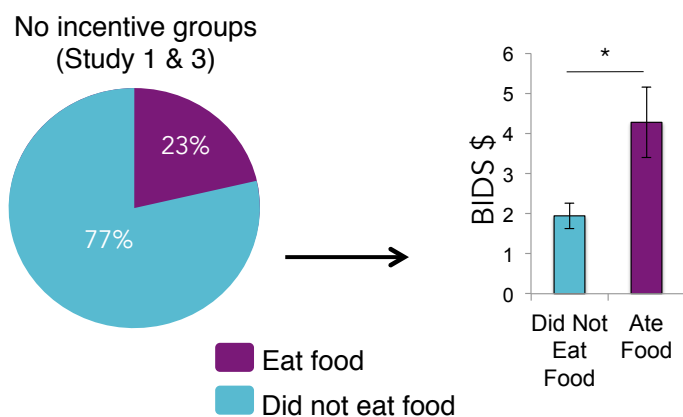

**Figure 5.** Mean bid for subjects who demonstrated self-control ‘failures’ (23%, depicted in purple) and those who did not (77%; depicted in blue) collapsed across Study 1 (control group) and 3 (stress group). Those participants who consumed the tempting food during the study revealed a higher willingness-to-pay to avoid control. (No participants from Study 2 consumed the tempting food, thus they were not included in this analysis). Error bars denote SEM.

1 **Secondary Analysis 2: Individual difference measures associated with**  
2 **control costs.** We next examined how individual differences across our entire  
3 sample related to self-control costs. Given that control costs were higher in  
4 participants exposed to an acute stressor (Study 3), we first sought to  
5 characterize how subjectively perceived stress related to willingness-to-pay to  
6 avoid self-control. To do this, we correlated mean bids and self-reported stress  
7 levels directly before the choice task across participants from all four studies  
8 (n=128). Perceived stress was positively correlated with average bidding  
9 behavior (Spearman's rho:  $r = 0.22$ ,  $P = .012$ ; **Figure 6A**), suggesting that, across  
10 all participants, subjective stress state was related to individuals' willingness-to-  
11 pay to avoid control.

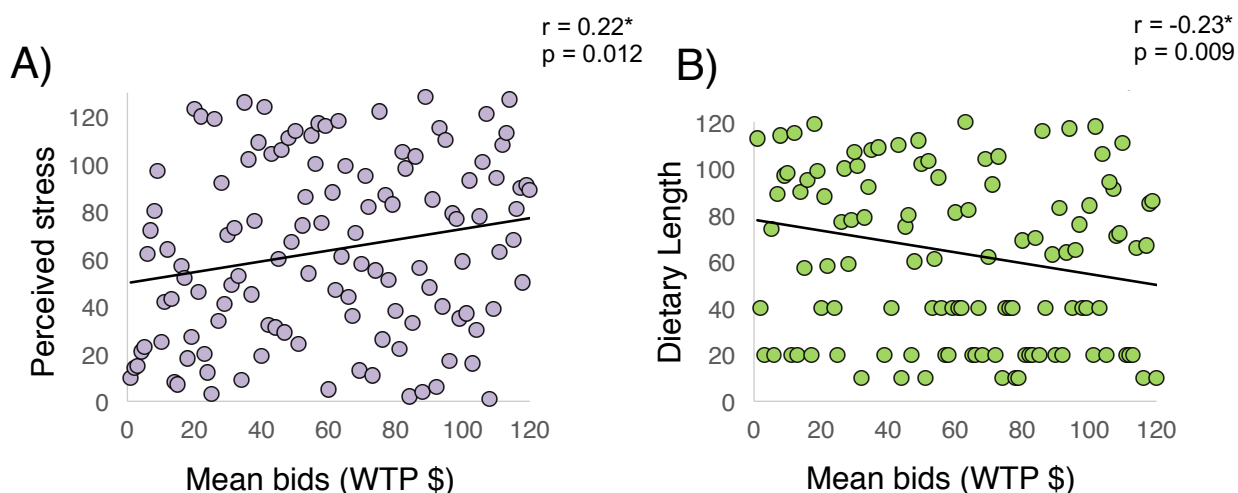

**Figure 6. Individual Difference Correlations.** (A) Perceived stress was positively correlated with average bidding behavior across participants; (B) Length of diet was negatively correlated with average bidding behavior across participants. \*denotes Spearman ranked correlation)

12 Given our evidence that self-control is explicitly costly to choosers, we reasoned  
13 that more experience (or success) avoiding temptation might relate to an  
14 individual's self-control costs. To explore this question, we conducted a  
15 correlation analysis between participants' length of diet and their average  
16 willingness-to-pay to avoid exercising self-control. This analysis revealed a  
17 significant negative correlation between mean bids and diet length (Spearman's



1 rho:  $r = -0.23$ ,  $P = .009$ ; **Figure 6B**). Thus, participants on a diet for a longer length  
2 of time tended to pay less to avoid temptation. We note that this does not reveal  
3 whether only those with idiosyncratically lower self-control costs succeed at  
4 remaining on a diet, whether self-control costs decline as one's diet progresses,  
5 or both. However, our method applied longitudinally could be used to answer  
6 such questions.

7

8 **Study 5: Willingness-to-pay to avoid control scales with temptation level.** If  
9 participants' willingness-to-pay to avoid temptation does in fact reflect the cost of  
10 self-control, then we would expect these costs to scale with varying levels of  
11 temptation (i.e., when facing a more highly tempting good, a subject should have  
12 to exert more self-control than when facing a less tempting good). To test this,  
13 we conducted a final study in an independent cohort of healthy, hungry dieters. In  
14 this study, participants again rated a series of snack foods on how healthy, tasty  
15 and tempting they were, which allowed us to identify a low, medium and high  
16 tempting food for each individual. On each trial, participants reported their  
17 willingness-to-pay (from \$0-\$10, from a \$10 endowment) to avoid each of the  
18 three food items for varying amounts of time (1-60 minutes; **Methods**). Unlike  
19 Study 1-4, all bids were reported prospectively (without any food present) and  
20 one trial was randomly selected at the end of the session to be realized. **Figure 7**  
21 depicts average bids for each time point for each level of temptation. A  
22 temptation level (low, medium, high) X time (1-60 minutes) RM-ANOVA revealed  
23 a significant main effect of temptation level ( $F_{(2,30)} = 33.06$ ,  $P < .0001$ ,  $\eta_p^2 = 0.69$ )  
24 and time with food ( $F_{(9,135)} = 29.12$ ,  $P < .0001$ ,  $\eta_p^2 = 0.67$ ), as well as a  
25 temptation X time interaction ( $F_{(18,270)} = 5.75$ ,  $P < .0001$ ,  $\eta_p^2 = 0.27$ ). Bids differed  
26 significantly for foods with low (mean bid =  $\$1.16 \pm 0.36$  SD), medium (mean bid  
27 =  $\$2.99 \pm 1.02$  SD), and high (mean bid =  $\$4.96 \pm 1.30$  SD) temptation levels.  
28 Further, bids scaled with each temptation level across increasing amounts of  
29 time (**Figure 7**). Planned contrasts demonstrated a significant linear increase in

- 1 bids with higher temptation level ( $F_{(1, 15)} = 43.95, P < .0001$ ) and, separately, with
- 2 increased time with the food ( $F_{(1, 15)} = 44.81, P < .0001$ ).

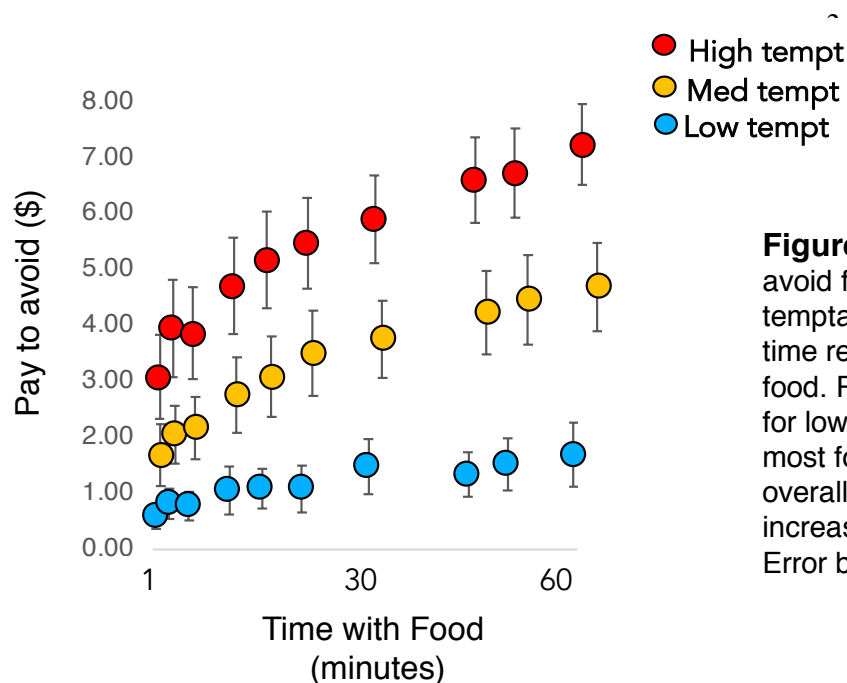

**Figure 7.** Willingness-to-pay to avoid foods that varied in temptation level and amount of time required to spend with food. Participants paid the least for low tempting foods and the most for high tempting foods overall, with bids scaling with increasing time with the food. Error bars depict SEM.

15

16

## DISCUSSION

17 A universal paradox in human behavior is our tendency to set difficult long-term  
18 goals but then to make choices that appear to contradict or undermine those  
19 goals. Using an economic decision-making paradigm, coupled with a sample of  
20 dieters avoiding tempting food rewards as a model of self-control more broadly,  
21 we found that people will pay to avoid temptation, quantitatively revealing their  
22 subjective cost of control under a variety of circumstances. We found that these  
23 costs are modulated by incentives (shows cost sensitivity) and acute stress  
24 exposure, consistent with the notion that motivational and affective state  
25 modulate one's willingness to exercise self-control. Finally, we showed that  
26 longer exposure to a tempting good imposes higher self-control costs (self-  
27 control costs obey monotonicity) and more tempting goods impose higher control  
28 costs at the within-subject level than do lower tempting goods (self-control costs  
29 order with temptation).

## SELF-CONTROL COSTS

19

1

2 Decades of psychological research have revealed that the act of engaging in  
3 self-control is subjectively effortful and aversive. Emerging work in the cognitive  
4 control literature has proposed that this experience stems from the cognitive  
5 costs imposed by deploying control, an account consistent with more recent  
6 economic theories of self-control (Gul & Pesendorfer, 2001/2004) that propose  
7 preferences for pre-commitment reveal an inherent psychological cost to  
8 resisting temptation. These converging lines of work provide a clear and testable  
9 hypothesis: Self-control failures may be better conceptualized as a rational  
10 decision that emerges when the costs of exercising control exceed the relative  
11 perceived benefits (Kurban et al., 2013; Berkman et al., 2017; Kool & Botnivick,  
12 2018). However, without a psychophysical method to precisely quantify these  
13 costs, self-control researchers have historically been left to *infer* whether and  
14 how much self-control a chooser requires to make goal-consistent decisions or to  
15 delay gratification. Our findings unite psychological and economic theories of  
16 self-control and provide empirical evidence that self-control is explicitly costly to  
17 humans and that these costs can be quantified by measuring the value of pre-  
18 commitment to restrict temptation.

19

20 Gul and Pesendorfer's theory is consistent with a growing body of psychological  
21 and neuroscience research that suggests people view cognitive demand as  
22 intrinsically costly and tend to avoid utilizing cognitive resources if possible  
23 (Kurzban et al. 2013; Westbrook & Braver, 2015; Shenhav et al. 2013/2017; Kool  
24 & Botnivik, 2018). These costs are thought to stem from limitations in the  
25 cognitive resources available to support the demands of control, suggesting self-  
26 control arises from evaluations of how valuable expenditures of control are  
27 perceived to be relative to how costly. This is a notable departure from classic  
28 psychological self-control models that view cognitive resources as depletable  
29 (i.e., both limited and diminished with use), arguing instead that such resources  
30 are finite and reallocated dynamically depending on the perceived costs and

## SELF-CONTROL COSTS

20

1 benefits (Kurzban et al., 2013; McGuire & Kable, 2015). Why some classes of  
2 cognitive control may be aversive or costly remains unclear. However, the  
3 approach presented here offers a metric for how aversive or costly individuals'  
4 find the exertion of self-control to be on a moment-to-moment basis.

5  
6 Our task employed two important features to probe the nature of self-control.  
7 First, our task measured momentary willingness to pay to avoid control  
8 prospectively (prior to food exposure) and again after participants encountered  
9 the tempting food. One possible explanation for why self-control appears to fail  
10 so often is that individuals may poorly estimate how costly self-control will be.  
11 Our data tends to lean against this conclusion. We observed no significant  
12 difference in measured control costs before versus after food exposure. This  
13 suggests that our participants had an accurate prospective awareness of the self-  
14 control costs they would later face. A second important feature of our task was  
15 that—unlike existing self-control decision paradigms—our bidding measurements  
16 were collected continuously over time, allowing us to track how these costs  
17 change with continued exposure to temptation. Some existing work (Baumeister,  
18 Bratslavsky, Muraven, & Tice, 1998; Muraven & Baumeister, 2000) suggests that  
19 that self-control becomes more difficult as it is continuously exerted. If this were  
20 true for our participants, we would expect their self-control costs to increase as  
21 the experiment progressed. Interestingly, we instead observed that participants'  
22 bids to avoid control were quite stable over time. The fact that participants'  
23 control costs did not increase over time as predicted by classic ego-depletion  
24 models is, however, consistent with a growing body of work suggesting that  
25 performance reductions are a not mandatory feature of engaging in control  
26 (Kurzban et al., 2013; Shenhav et al. 2013/2017; Kool & Botnivik, 2018). Our  
27 findings offer empirical support for these value-based frameworks that argue thus  
28 individuals need not necessarily experience decrements in control performance  
29 as long as the perceived benefit of deploying control continues to outweigh the

## SELF-CONTROL COSTS

21

1 cost. We note, however, that our data on this point is relevant only to the  
2 intervals of time tested here (under an hour in total duration).

3

4 The stability in our participants' willingness to pay to avoid exerting control may  
5 also reflect the *lack of temporal uncertainty* inherent in our task. In a recent line  
6 of work, McGuire and Kable (2013/2015) demonstrated that behavior in a range  
7 of delay-of-gratification tasks (including the famous 'marshmallow task', Mischel  
8 & Ebbesen, 1970) might be explained by the underlying predictions participants  
9 have regarding when a delayed outcome will arrive. They suggested that one  
10 major reason individuals appear to 'succumb' to temptation is that under  
11 temporal uncertainty, individuals may rationally conclude that the delayed  
12 outcome may no longer be worth waiting for. In our study participants were fully  
13 informed regarding the temporal structure of the task and were at all times aware  
14 that self-control would be engaged only for a finite period of time. This feature of  
15 our task may explain the stability observed in participants reported bids over  
16 time. An open question for future research is whether imposing temporal  
17 uncertainty, or requiring self-control for longer periods of time (Blain et al., 2016)  
18 than we used in our task, might lead to an increase in ongoing self-control costs.

19

20 Self-control research across disciplines suggests that we should be able to  
21 induce changes in these costs with changes in motivational state. Consistent with  
22 the notion that decisions to engage in self-control arise from a dynamic cost-  
23 benefit evaluation (Berkman et al., 2016), we found that willingness to pay for  
24 pre-commitment increased as the cost of failing to adhere to one's diet  
25 increased. When faced with losing \$15 in addition to failing to adhere to their diet,  
26 participants were willing to pay to restrict access to temptation, thus pre-  
27 commitment became more valuable. These findings are consistent with work  
28 showing that motivational incentives can increase willingness to engage in self-  
29 control strategies (Hagger et al, 2010; Krebs et al., 2010) and demonstrate  
30 overall cost-sensitivity in the self-control mechanism.

1

2 We also observed an increase in the cost of self-control when participants  
3 underwent an acute stress induction. Stress exposure has long been thought to  
4 compromise self-control (Hockney, 1983; Holding, 1983), and this intuition has  
5 been borne out in a large body of empirical work—from the cognitive  
6 neuroscience literature that shows stress diminishes cognitive capacity and  
7 flexibility (Schoofs et al 2009; Plessow et al 2009) and selectively reduces goal-  
8 directed control of decisions (Schwabe & Wolf 2009; Otto, Raio, et al., 2013) to  
9 the clinical literature where stressors remain a primary risk factor for the  
10 emergence and relapse of addiction-related disorders (Sinha, 2011). Our findings  
11 provide a direct test of whether stress compromises self-control by increasing its  
12 associated cognitive cost. This relationship was also observed beyond  
13 participants assigned stress condition, as higher self-control costs were positively  
14 associated with perceived stress scores.

15

16 Finally, confirming that our bids did in fact reflect the cost of self-control and not  
17 random baseline bidding behavior, we found that the average magnitude of bids  
18 scaled with increasing levels of temptation. By testing bidding behavior across  
19 varying degrees of temptation level and a broader range of times with the food,  
20 we were able to confirm that willingness to pay for pre-commitment tracks with  
21 the increased cost of resisting temptation, demonstrating that the cost of self-  
22 control appears to increase monotonically with duration and that more highly  
23 tempting goods induce higher self-control costs Overall, our findings suggest that  
24 measuring the control costs can yield unique information about the subjective  
25 experience of resisting temptation that cannot be revealed using existing  
26 measures of self-control.

27

28 Given its central importance as a strategy to help individuals achieve their long-  
29 term goals, some laboratory studies have recently measured preferences for pre-  
30 commitment (Crocket et al., 2013; Schwartz et al., 2014; Soutschek et al.,

1 2017/2020). These studies have provided evidence that choosers may express a  
2 preference to restrict impulsive choices by committing to larger, later rewards. A  
3 recent study further showed that higher impulsivity and meta-cognitive  
4 awareness leads to a stronger preference for pre-commitment (Soutschek et al.,  
5 2020). Our results add to this growing literature by demonstrating that individuals  
6 are also willing to incur a monetary cost to restrict temptation, suggesting that  
7 sophisticated choosers will pay for pre-commitment when available as a choice  
8 option.

9

10 Our study is not without limitations. First, we acknowledge that there are likely  
11 many different components to what makes the exertion of self-control cognitively  
12 costly. For example, there may be cognitive costs to resisting temptation and  
13 also personal and health costs associated with self-control failures. While our  
14 task does not currently dissociate among the components that feed into self-  
15 control costs more generally, this is an open area for future research. Second,  
16 unlike some studies in the human stress literature we included *both* men and  
17 women in each of our samples. However, we did not measure menstrual phase,  
18 oral contraceptive use or cycle-dependent sex hormones, which have been  
19 shown to impact stress responses in women (Kirschbaum et al., 1999;  
20 Hellhammer et al., 2009). Future work measuring such factors may reveal  
21 interesting patterns in control costs that we were unable to detect here.

22

23 In summary, we report a novel task for measuring the subjective cost of self-  
24 control. Our findings are consistent with emerging work across disciplines  
25 suggesting that self-control and its failures can be seen as fundamentally rational  
26 responses to a complex world in which individuals' trade-off the cognitive cost of  
27 resisting immediate temptation against the benefits of achieving future goals.

1 **METHODS**

2 **Participants.** 138 healthy young adult participants that indicated they were on a  
3 diet to maintain or lose weight participated in the study. Participants were  
4 recruited using flyers posted on and around the NYU campus, as well as  
5 electronic advertisements on New York University's Department of Psychology  
6 website. Participants were excluded prior to participation for the following  
7 reasons: (1) pregnancy; (2) high-blood pressure or a heart condition; (3) history  
8 or medication for neurological or psychiatric disorders; (4) diabetes, metabolic  
9 disorders, food allergies or history of eating disorders; and (5) use of  
10 corticosteroids or beta-blockers. All participants provided written informed  
11 consent in accordance with experimental procedures approved by the New York  
12 University Committee on Activities Involving Human Subjects. All research and  
13 experimental procedures were performed in accordance with approved IRB  
14 guidelines and regulations.

15 Subjects were paid \$15 per hour plus a \$10 bidding endowment. Six participants  
16 from the stress groups were unable to complete the CPT task and were thus  
17 excluded. Two additional participants were removed prior to data analysis  
18 because they revealed that they were on special diets to sustain (and ideally  
19 increase rather than decrease) weight and two others were excluded for being on  
20 medication (revealed after the experiment ended). Our final analysis included a  
21 total of 128 healthy participants (84 women) with a mean age of 24.37 (SD =  
22 7.07; range = 18-55).

23

24 **General Procedure (Study 1-4).** Hungry, healthy dieters were asked to abstain  
25 from eating 3-4 hours before participating in the study. Upon arrival at the  
26 laboratory, participants provided informed consent and were escorted to the  
27 experiment room for a 10-minute acclimation period, after which they rated their  
28 current hunger level (from 1-10), completed the food rating and ranking scales.  
29 After baseline cortisol was collected, participants received their \$10 (cash)



1 endowment. They then received instructions regarding the self-control decision  
2 task and were explicitly informed about which high- and low-tempting foods they  
3 would be making choices about during the study. (Note: participants in Studies 2  
4 & 4 were further instructed that they would lose a \$15 bonus payment provided at  
5 the end of the study if they consumed the tempting food at any point.) All  
6 participants then completed either the CPT or control task and were given a 10-  
7 minute break in the experiment room before an additional cortisol sample was  
8 collected. This break was implemented to ensure that cortisol levels induced by  
9 the CPT would be begin to peak in coordination with the choice task. Participants  
10 then completed the self-control decision task (see **Decision-Making Task**),  
11 during which they indicated the maximum amount that they would be willing to  
12 pay to remove the high-tempting food from the room and replace it with the low-  
13 tempting food. After the 30-minute bidding phase of the task was complete, the  
14 final cortisol sample was collected and the final phase of the experiment began,  
15 during which participants were required to remain in the experiment room with  
16 the high- or low-tempting food for the final 30 minutes of the study (see **Bid**  
17 **Realization**). Once this 30-minute final phase was over participants were paid for  
18 their time and left the laboratory.

19

20 **Stress Induction Technique.** All participants in the stress group (Studies 3 & 4)  
21 completed the CPT, for which participants submerged their right forearms in ice-  
22 cold water (0 °C to 4 °C) for 3 min continuously. All participants in the control  
23 group (Studies 1 & 2) followed the exact same procedure using room-  
24 temperature water (30 °C to 35 °C). The CPT is widely used in laboratory  
25 settings to model the effects of mild to moderate stress and reliably generates  
26 both autonomic nervous system and HPA-axis activation, as measured by  
27 increased physiological arousal, neuroendocrine responses, and subjective  
28 stress ratings (Lovallo, 1975; Velasco, Gómez, Blanco & Rodriguez, 1997;  
29 McRae et al. 2006).

30

1 **Neuroendocrine Assessment.** Saliva samples were collected throughout the  
2 study to assess cortisol concentrations, which serve as neuroendocrine markers  
3 of stress response. Participants were run between 12 and 5pm to control for  
4 diurnal rhythms of stress hormone levels. Saliva samples were collected using a  
5 high-quality synthetic polymer-based salivette placed under participants' tongues  
6 for two minutes. Participants were initially seated in the experiment room for a  
7 10-minute acclimation period, during which they drank 4 oz of water to clear any  
8 residual saliva. Samples were collected at baseline (sample 1), 10 minutes after  
9 the CPT/control task administration (sample 2), and directly before the choice  
10 realization began (~30 minutes after the CPT/control task administration; sample  
11 3). Samples were immediately stored in a sterile tube and preserved in a freezer  
12 set to  $-80^{\circ}\text{C}$ . Samples were analyzed by the Psychobiological Research  
13 Laboratory of the University of Trier, Germany, using a time-resolved  
14 immunoassay with fluorometric detection (DELFI, cf. Dressendörfer et al.,  
15 1992). Duplicate assays were conducted for each sample, and the average of the  
16 two values was used in our analyses. Any samples that contained insufficient  
17 saliva could not be analyzed and were excluded from our analyses. Cortisol data  
18 was log-transformed to account for the skewed nature of cortisol distributions.

19

20 **Food Item Scales & Selection.** In order to select a high- and low-tempting food  
21 item for each individual, participants completed a series of food rating scales  
22 prior to the study. Participants separately rated 20 food items (see **Figure S3** for  
23 choice set) on how tasty, healthy and tempting these items were from 1 (not at  
24 all) to 10 (very much so). Participants then ranked these 20 food items from best  
25 (#1) to worst (#20) for their current diet. Low-tempting foods were chosen by a  
26 computer algorithm that identified foods that fell in the lowest 20% of taste and  
27 temptation ratings, the highest 20% of health ratings and that was ranked in the  
28 upper 10% of foods best for the participants' current diet. Conversely, high-  
29 tempting foods were identified as those that fell in the upper 20% of taste and

1 temptation ratings, the lowest 20% of health ratings and that was ranked in the  
2 lowest 10% of foods worst for the participants' current diet.

3

4 ***Decision-making Task (Figure 1).*** To directly examine individuals' subjective  
5 cost of self-control, we designed an incentive-compatible decision-making task  
6 that measured the monetary costs that participants were willing to incur to avoid  
7 temptation on a moment-to-moment basis. There were two phases of the task:  
8 (1) a bidding phase, during which participants indicated the maximum they would  
9 be willing-to-pay from a \$10 endowment to remove the high-tempting food from  
10 the room and replace it with the low-tempting food; and (2) a final realization  
11 phase, during which participants sat in the experiment room with the food for the  
12 final 30 minutes of the experiment. Participants in Studies 2 & 4 were further  
13 instructed that they would lose a \$15 bonus payment at the end of the study if  
14 they consumed the tempting food at any point.

15 On each trial, participants viewed a computer screen that prompted them  
16 to enter the maximum amount that they were currently willing-to-pay to remove  
17 the high-tempting food from the room and replace it with the low-tempting food.  
18 Participants registered their bids with an open response-window by using the  
19 mouse to control a sliding bar that ranged from \$0 to \$10 (in \$0.01 increments)  
20 and clicking the mouse on their selected bid. Bid trials were presented  
21 approximately every 3 minutes (Studies 2 & 4) or 2 minutes (in an effort to  
22 acquire more precise temporal measurements of bids) for a total of 10 bids for  
23 Study 2 & 4 and 15 bids for Studies 1 & 3. Choices were presented using  
24 PsychToolBox.

25 After each bid was received there was a 2% chance that this bid would be  
26 immediately employed in a procedure that would lead to the final 30-minute  
27 phase in which the high-tempting or low-tempting food would be in the room with  
28 the subject. This incentivized participants to bid their true value for removing the  
29 high-tempting food since the bidding phase of the task could end on any trial and  
30 only the current bid would be used to determine whether the food was removed

## SELF-CONTROL COSTS

28

1 for the 30-minute final phase. The 2% hazard rate also ensured that the majority  
2 of bidding trials would not be realized, allowing us to track the dynamics of how  
3 self-control costs change over time with greater exposure to temptation. Finally,  
4 this feature of the task allowed us to eliminate any effect of temporal discounting  
5 on the sequential bids. To realize bids, we used a standard Becker-DeGroot-  
6 Marschak (BDM) auction procedure widely used to reveal maximum willingness-  
7 to-pay (see ***Bid Realization Procedure*** below).

8 For the initial bidding trial, no food was present in the room. If this initial  
9 trial was not realized, the food was brought in the room and remained there until  
10 a bid was implemented or the bidding phase concluded. (If the trial was realized  
11 the BDM procedure determined whether the food was brought into the room for  
12 30 minutes. Immediately after each bidding trial, participants were notified as to  
13 whether that particular bid would be implemented. If no bid was realized by the  
14 end of the 30-minute bidding phase, the task transitioned automatically to the  
15 final 30-minute realization phase.

16

17 ***Bid Realization Procedure.*** To determine whether the participant won or lost  
18 the opportunity to replace the high-tempting food with a low-tempting food, a  
19 standard economic auction procedure was implemented (DeGroot-Marschak;  
20 BDM). Participants selected a selling chip from a bag (chips ranged from \$0 to  
21 \$10 in \$0.01 increments) and this selected chip represented the *winning sell*  
22 *price*. This randomly selected sell price was then compared against the  
23 participant's current bid. If the bid price was greater or equal to that of the sell  
24 price, then the participant won the auction and they paid the *sell price* (not the bid  
25 price) from their endowment to have the high-tempting food removed. If the bid  
26 was lower than the sell price the participant lost the auction. In this case, the  
27 high-tempting food remained in the room for the remainder of the experiment and  
28 the participant would keep the entire endowment. This procedure incentivizes  
29 participants to report their true maximum willingness-to-pay.

30

1 **Study 5.** An additional 20 participants were recruited following the same  
2 recruitment, screening, informed consent and payment procedures as Study 1-4  
3 (**Participants**). Two participants were excluded for using medications on our  
4 exclusion criteria. Due to a computer software error, data from two other  
5 participants was not recorded. Participants were asked to refrain from eating  
6 prior to coming into the lab and began by rating the same series of 20 food items  
7 (see **Figure S3** for choice set) on how tasty, healthy and tempting these items  
8 were from 1 (not at all) to 10 (very much so). These ratings allowed us to select a  
9 low, medium and high tempting food for each participant. On each trial,  
10 participants viewed an image of a snack food that varied on temptation level (low,  
11 moderate, high) and amount of time for which participants would potentially have  
12 to spend with the food (1, 3, 5, 10, 15, 20, 25, 30, 45, 60 minutes). Participants  
13 viewed the food for 4 seconds and then entered their how much they were willing  
14 to pay (from \$0-\$10) from a \$10 endowment to avoid that food, given the  
15 temptation level, quantity and time amount. After the 90 trials were completed,  
16 one trial was randomly selected and the same BDM auction procedure was used  
17 to identify whether the participants won or lost the auction based on their bid for  
18 that given trial (**Bid Realization Procedure**). All participants remained in the  
19 experimental room for 1 hour after the bidding task was complete in order to  
20 control for the cost of time (i.e., to ensure bids did not reflect an aversion to  
21 waiting for the allocated amount of time relative to the cost of control). If  
22 participants lost the auction, the food was present in the room for the amount of  
23 time stated on the selected trial (e.g., if the trial depicted 15 minutes with the  
24 food, then the participant spent 15 minutes of the full hour with the food). If they  
25 won the auction then the food was not present during this amount of time.

26  
27 **Data Analysis.** All statistical analysis for behavioral and cortisol data was carried  
28 out using SPSS (version 20.0, 2011; IBM Corp., Armonk, NY). Due to the  
29 skewed nature of cortisol concentration distributions documented in the literature  
30 (Miller et al, 2013), cortisol values were log-transformed in order to better

## SELF-CONTROL COSTS

30

1 approximate a Gaussian (normal) distribution. Data were tested for equal  
2 variances using Mauchly's sphericity tests and Greenhouse–Geisser corrections  
3 were performed to address any violations of sphericity. Analysis of variance  
4 (ANOVA) with repeated measures was used to analyze all choice (i.e., bidding)  
5 and cortisol data. Post hoc comparisons were conducted using Student *t*-tests  
6 when appropriate. All tests were two-tailed and considered statistically significant  
7 when  $p < .05$ .

8 ***Data and Code Availability.*** The data sets generated during and/or analyzed  
9 during the current study are available from the corresponding author on  
10 reasonable request.

***Acknowledgments.*** We thank all members of PWG's laboratory, especially  
Anna Konova and Christopher K. Steverson, for helpful feedback, comments and  
discussion. This work was supported by NIH Grant F32MH110135-01A1 and a  
NARSAD Young Investigator Grant from the Brain & Behavior Research  
Foundation to CMR and NIH Grant R01DA038063 to PG.

## References

- Ainslie, G. (1975) Specious reward: a behavioral theory of impulsiveness and impulse control. *Psychological Bulletin*, 82 (4), 463-496.
- Ariely, D. & Wertenbroch, K. (2002) Procrastination, deadlines, and performance: self-control by precommitment. *Psychological Sciences*, 13(3): 219–24.
- Arnsten AFT (2009) Stress signalling pathways that impair prefrontal cortex structure and function. *Nat Rev Neurosci* 10(6):410–422.
- Becker GM, DeGroot MH, Marschak J (1964) Measuring utility by a single-response sequential method. *Behavioral Science*, 9(3): 226–32.
- Berkman, E.T., Hutcherson, C.A., Livingston, J.L., Kahn, L.E. and Inzlicht, M. (2017) Self-control as a value-based choice. *Current Directions in Psychological Science*, 26(5):422-428.
- Baumeister, R. F., & Heatherton, T. F. (1996). Self-regulation failure: An overview. *Psychological Inquiry*, 7, 1–15.
- Baumeister, R. F., Bratslavsky, E., Muraven, M., & Tice, D. M. (1998). Ego depletion: Is the active self a limited resource? *Journal of Personality and Social Psychology*, 74, 1252–1265.
- Bastien, B., Hollard, G., and Pessiglione, M. (2016) Neural fatigue and intertemporal choice. *Proceedings of the National Academy of Sciences*, 113 (25) 6967-6972.
- Bryan, G., Karlan, D. and Nelson, S. (2010) Commitment Devices. *Annual Review of Economics*, 2, 671–98.
- Crockett, M.J., Braams B.R., , Clark, L., Tobler, P.T., Robbins, T.W. and Kalenscher, T. Restricting temptations: neural mechanisms of precommitment. *Neuron*, 79(2), 391-401.
- Fishburn, P.C., Rubinstein, A., 1982. Time preference. *Int. Econ. Rev.* 23 (3), 677-694.
- Frederick, S., Loewenstein, G., O'Donoghue, T., 2002. Time discounting and time preference: a critical review. *Journal of Economic Literature*, 40, 351-401.

Fudenberg, D., & Levine, D.K. (2006) A dual-self model of impulse control." *American Economic Review*, 96(5): 1449-1476.

Gul, F. & Pesendorfer, W. (2001) Temptation and self-control. *Econometrica* 69(6):1403–35.

Gul, F. & Pesendorfer, W. (2004) Self-control and the theory of consumption. *Econometrica* 72(1):119–58.

Hagger, M. S. et al. A multilab preregistered replication of the ego-depletion effect. *Perspect. Psychol. Sci.* **11**, 546–573 (2016).

Hellhammer, D.H., Wu“st, S. and Kudielkam B.M. (2009) Salivary cortisol as a biomarker in stress research. *Psychoneuroendocrinology*, 34, 163–171.

Hockey, G. (1s983) Stress and fatigue in human performance. Wiley. [MI]

Holding, D. H. (1983) Fatigue. In: Stress and fatigue in human performance, ed. G. Hockey, pp. 145–67. Wiley.

Kable, J.W., and Glimcher, P.W. (2007). The neural correlates of subjective value during intertemporal choice. *Nature Neuroscience*, 10, 1625–1633.

Kahneman, D. (2011). *Thinking, fast and slow*. London: Allen Lane.

Kirschbaum, C., Kudielka, B.M., Gaab, J., Schommer, N.C., Hellhammer, D.H. (1999) Impact of gender, menstrual cycle phase, and oral contraceptives on the activity of the hypothalamus-pituitary-adrenal axis. *Psychosom Med.* 61:154-162.

Kool, W., & Botvinick, M. (2018) Mental labour. *Nature Human Behavior*, 2: 899–908.

Krebs, R. M., Boehler, C. N. & Woldorff, M. G. (2010) The influence of reward associations on conflict processing in the Stroop task. *Cognition* 117(3):341–47.

Kurzban, R., Duckworth, A., Kable, J.W. and Myers, J. (2013) An opportunity cost model of subjective effort and task performance. *Behavioral and Brain Science*, 36, 661-679.

Laibson D. Golden eggs and hyperbolic discounting. *Q J Econ* 1997;12:443–477

Lovullo W (1975) The cold pressor test and autonomic function: A review and integration. *Psychophysiology* 12:268–282.



Mazur, 1982McRae AL, et al. (2006) Stress reactivity: Biological and subjective responses to the cold pressor and Trier Social stressors. *Hum Psychopharmacol* 21(6):377–385.

Mischel, W., & Ebbesen, E. B. (1970). Attention in delay of gratification. *Journal of Personality and Social Psychology*, 16, 329–337.

Mischel, W., Ebbesen, E. B., & Zeiss, A. R. (1972). Cognitive and attentional mechanisms in delay of gratification. *Journal of Personality and Social Psychology*, 21, 204–218.

Mischel, W., Ayduk, O., & Mendoza-Denton, R. (2003). Sustaining delay of gratification over time: A hot-cool systems perspective. In G. Loewenstein, D. Read, & R. F. Baumeister (Eds.), *Time and decision: Economic and psychological perspectives on intertemporal choice* (pp. 175–200). New York, NY: Sage.

Mischel, W., Shoda, Y., and Rodriguez, M.I. (1989). Delay of gratification in children. *Science*, 244, 933–938.

McGuire, J.T. and Kable, J.W. (2013) Rational temporal predictions can underlie apparent failures to delay gratification. *Psychological Review*, 120(2), 395–410.

McGuire, J.T. and Kable, J.W. (2015) Medial prefrontal cortical activity reflects dynamic re-evaluation during voluntary persistence. *Nat Neurosci* 18, 760–766.

Miller, R., Plessow, F., Rauh, M., Gröschl, M., and Kirschbaum, C. (2013) Comparison of salivary cortisol as measured by different immunoassays and tandem mass spectrometry. *Psychoneuroendocrinology* 38:50–57.

Muraven, M., Tice, D. M., & Baumeister, R. F. (1998). Self-control as limited resource: Regulatory depletion patterns. *Journal of Personality and Social Psychology*, 74, 774 –789.

Muraven, M., and Baumeister, R.F. (2000). Self-regulation and depletion of limited resources: does self-control resemble a muscle? *Psychological Bulletin*, 126, 247–259.

Otto, A. R., Raio, C. M., Chiang, A., Phelps, E. A., & Daw, N. D. (2013). Working-memory capacity protects model-based learning from stress. *Proceedings of the National Academy of Sciences*. 110(52), 20941-20946.

Petzold, A., Plessow, F., Goschke, T. & Kirschbaum, C. (2010) Stress reduces use of negative feedback in a feedback-based learning task. *Behavioral Neuroscience*, 124, 248-255.

Schelling, T. C. (1984). Self-command in practice, in policy, and in a theory of rational choice. *The American Economic Review*, 74, 1–11.

Schoofs D, Wolf OT, Smeets T (2009) Cold pressor stress impairs performance on working memory tasks requiring executive functions in healthy young men. *Behav Neurosci* 123(5):1066–1075.

Schwabe L, Wolf OT (2011) Stress-induced modulation of instrumental behavior: from goal-directed to habitual control of action. *Behav Brain Research*, 219(2):321–328.

Schwartz, J., Mochon, D., Wyper, L., Maroba, J., Patel, D., & Ariely, D. (2014) Healthier by precommitment. *Psychological Science*, Vol. 25(2): 538-546.

Sinha R (2001) How does stress increase risk of drug abuse and relapse? *Psychopharmacology (Berl)*, 158(4):343–359.

Shenhav, A. et al. (2013) The expected value of control: an integrative theory of anterior cingulate cortex function. *Neuron*, 79, 217-240

Soutschek, A., Ugazio, G., Crockett, M.J., Ruff, C.C., Kalenscher, T. and Tobler, P.N. (2017) Binding oneself to the mast: stimulating frontopolar cortex enhances precommitment. *Social Cognitive and Affective Neuroscience*, 12(4): 635–642.

Strotz (1956). Myopia and inconsistency in dynamic utility maximization. *Review of Economic Studies*, 23(3):165–80.

Thaler, R.H. & Shefrin, H.M. (1981) An economic theory of self-control. *Journal of Political Economics*, 89:392–406.

Tversky, A. & Thaler, R.H. Preference Reversals. *Journal of Economic Perspectives*, 4(2): 201–21.

Velasco M, Gómez J, Blanco M, Rodriguez I (1997) The cold pressor test: Pharmacological and therapeutic aspects. *Am J Ther* 4:34–38.

Westbrook. A. & Brave, T.S. (2015) Cognitive effort: a neuroeconomic approach. *Cognitive, Affective and Behavioral Neuroscience*, 15, 395-415
